# Supplementary material for: SAMHD1 single nucleotide polymorphisms impact outcome in children with newly diagnosed acute myeloid leukemia
Source: PubMed Central journal article supplement — Blood Adv. 2023 Jan 24;7(11):2538–50. doi: 10.1182/bloodadvances.2022009088 (PMC10242642; doi:10.1182/bloodadvances.2022009088), 2023-01-24
Supplement: BLOODA_ADV-2022-009088-mmc1.pdf [file BLOODA_ADV-2022-009088-mmc1.pdf]

Supplementary Information :

| <b>Supplementary Table 1. List of SNPs Included in Analysis</b> |                 |                         |                         |                         |
|-----------------------------------------------------------------|-----------------|-------------------------|-------------------------|-------------------------|
| <b>Gene Name</b>                                                | <b>SNP rsID</b> | <b>SNP Location</b>     | <b>MAF AML02 Cohort</b> | <b>MAF AML08 Cohort</b> |
| SAMHD1                                                          | rs12481143      | Intron Variant          | 0.147                   | 0.152                   |
| TLDC2                                                           | rs1291128       | Intron Variant          | 0.494                   | 0.487                   |
| TLDC2                                                           | rs1291131       | Intron Variant          | 0.111                   | 0.109                   |
| TLDC2                                                           | rs1291133       | Intron Variant          | 0.443                   | 0.453                   |
| SAMHD1                                                          | rs1291141       | 3 Prime UTR Variant     | 0.246                   | 0.264                   |
| SAMHD1                                                          | rs1291149       | Intron Variant          | 0.235                   | 0.249                   |
| SAMHD1                                                          | rs1935919       | Intron Variant          | 0.180                   | 0.159                   |
| SAMHD1                                                          | rs200444706     | Intron Variant          | 0.434                   | 0.431                   |
| SAMHD1                                                          | rs34143163      | 500B Downstream Variant | 0.063                   | 0.062                   |
| SAMHD1                                                          | rs3762214       | Intron Variant          | 0.173                   | 0.167                   |
| SAMHD1                                                          | rs4812586       | Intron Variant          | 0.231                   | 0.247                   |
| SAMHD1                                                          | rs6016755       | Intron Variant          | 0.111                   | 0.108                   |
| SAMHD1                                                          | rs6016783       | Intron Variant          | 0.488                   | 0.494                   |
| SAMHD1                                                          | rs6029941       | 3 Prime UTR Variant     | 0.443                   | 0.451                   |
| SAMHD1                                                          | rs6030339       | Intron Variant          | 0.177                   | 0.161                   |
| SAMHD1                                                          | rs6030346       | Intron Variant          | 0.069                   | 0.062                   |
| SAMHD1                                                          | rs6030347       | Intron Variant          | 0.191                   | 0.158                   |
| SAMHD1                                                          | rs6065461       | Intron Variant          | 0.259                   | 0.225                   |
| SAMHD1                                                          | rs6072746       | Intron Variant          | 0.377                   | 0.393                   |
| SAMHD1                                                          | rs6102697       | Intron Variant          | 0.198                   | 0.180                   |
| NA                                                              | rs6103006       | unknown                 | 0.219                   | 0.163                   |
| SAMHD1                                                          | rs7265241       | 3 Prime UTR Variant     | 0.069                   | 0.052                   |
| SAMHD1                                                          | rs7268811       | Intron Variant          | 0.129                   | 0.120                   |
| SAMHD1                                                          | rs78034281      | 2KB Upstream Variant    | 0.069                   | 0.058                   |
| SAMHD1                                                          | rs78378047      | Intron Variant          | 0.204                   | 0.197                   |

**Supplementary Table 2. List of SNPs in LD with Top SNPs****SNP: rs7265241 and variants with  $r^2 \geq 0.8$** 

| Chr | Pos (hg38) | LD ( $r^2$ ) | LD (D') | Variant     | Ref | Alt | AFR Freq | AMR Freq | ASN Freq | EUR Freq | GENCODE Genes | dbSNP Functional Annotation |
|-----|------------|--------------|---------|-------------|-----|-----|----------|----------|----------|----------|---------------|-----------------------------|
| 20  | 36880145   | 0.95         | 1       | rs7273826   | G   | A   | 0.11     | 0.08     | 0.01     | 0.08     | C20orf118     | intronic                    |
| 20  | 36881623   | 0.95         | 1       | rs74584244  | T   | A   | 0.11     | 0.08     | 0.01     | 0.08     | C20orf118     | intronic                    |
| 20  | 36884209   | 0.96         | 1       | rs79879305  | A   | G   | 0.11     | 0.08     | 0.01     | 0.08     | C20orf118     | intronic                    |
| 20  | 36885156   | 0.96         | 1       | rs6129995   | C   | G,T | 0.12     | 0.08     | 0.01     | 0.08     | C20orf118     | intronic                    |
| 20  | 36886420   | 1            | 1       | rs115579156 | C   | T   | 0.03     | 0.08     | 0.01     | 0.08     | C20orf118     | intronic                    |
| 20  | 36891543   | 1            | 1       | rs7265241   | A   | G   | 0.05     | 0.09     | 0.01     | 0.08     | C20orf118     | intronic                    |
| 20  | 36910635   | 0.96         | 1       | rs115720427 | C   | T   | 0.05     | 0.07     | 0.01     | 0.07     | SAMHD1        | intronic                    |
| 20  | 36918472   | 0.96         | 1       | rs116789513 | T   | A   | 0.05     | 0.07     | 0.01     | 0.07     | SAMHD1        | intronic                    |
| 20  | 36919095   | 0.96         | 1       | rs138727676 | C   | G   | 0.06     | 0.07     | 0.01     | 0.07     | SAMHD1        | intronic                    |
| 20  | 36921689   | 0.96         | 1       | rs7271200   | A   | G   | 0.05     | 0.07     | 0.01     | 0.07     | SAMHD1        | intronic                    |
| 20  | 36936958   | 0.96         | 1       | rs148248680 | T   | G   | 0.05     | 0.07     | 0.01     | 0.07     | SAMHD1        | intronic                    |
| 20  | 36938337   | 0.96         | 1       | rs138198428 | C   | T   | 0.06     | 0.07     | 0.01     | 0.07     | SAMHD1        | intronic                    |

**SNP: rs1291141 and variants with  $r^2 \geq 0.8$** 

|    |          |      |       |             |    |   |      |      |      |      |           |          |
|----|----------|------|-------|-------------|----|---|------|------|------|------|-----------|----------|
| 20 | 36879632 | 0.9  | 0.96  | rs1024191   | A  | T | 0.6  | 0.67 | 0.58 | 0.85 | C20orf118 | intronic |
| 20 | 36881006 | 0.94 | 0.98  | rs1291126   | T  | G | 0.61 | 0.67 | 0.58 | 0.85 | C20orf118 | intronic |
| 20 | 36887791 | 1    | 1     | rs1291139   | A  | T | 0.6  | 0.65 | 0.52 | 0.85 | C20orf118 | intronic |
| 20 | 36890036 | 1    | 1     | rs1291141   | T  | G | 0.6  | 0.65 | 0.52 | 0.85 | C20orf118 | intronic |
| 20 | 36897237 | 1    | 1     | rs1291143   | A  | C | 0.72 | 0.66 | 0.52 | 0.85 | SAMHD1    | intronic |
| 20 | 36899487 | 0.98 | 1     | rs1291144   | A  | G | 0.63 | 0.65 | 0.52 | 0.84 | SAMHD1    | intronic |
| 20 | 36900367 | 0.94 | -1    | rs138572736 | TC | T | 0.32 | 0.33 | 0.45 | 0.15 | SAMHD1    | intronic |
| 20 | 36900598 | 0.95 | 1     | rs1291146   | T  | C | 0.32 | 0.62 | 0.52 | 0.84 | SAMHD1    | intronic |
| 20 | 36901350 | 0.99 | 1     | rs1291147   | G  | A | 0.68 | 0.66 | 0.52 | 0.84 | SAMHD1    | intronic |
| 20 | 36903538 | 0.84 | 1     | rs6030021   | A  | T | 0.64 | 0.64 | 0.5  | 0.82 | SAMHD1    | intronic |
| 20 | 36903539 | 0.81 | 1     | rs6030022   | A  | C | 0.63 | 0.63 | 0.5  | 0.82 | SAMHD1    | intronic |
| 20 | 36905059 | 1    | 1     | rs1291149   | C  | T | 0.68 | 0.66 | 0.52 | 0.85 | SAMHD1    | intronic |
| 20 | 36916270 | 0.94 | -0.97 | rs4812586   | A  | G | 0.32 | 0.35 | 0.49 | 0.15 | SAMHD1    | intronic |
| 20 | 36918247 | 0.94 | -0.97 | rs7261175   | G  | A | 0.32 | 0.34 | 0.48 | 0.15 | SAMHD1    | intronic |
| 20 | 36922795 | 0.93 | -0.97 | rs2342113   | A  | C | 0.32 | 0.33 | 0.48 | 0.15 | SAMHD1    | intronic |
| 20 | 36922799 | 0.93 | -0.97 | rs6130114   | C  | G | 0.32 | 0.33 | 0.48 | 0.15 | SAMHD1    | intronic |

|    |          |      |       |            |   |   |      |      |      |      |        |          |
|----|----------|------|-------|------------|---|---|------|------|------|------|--------|----------|
| 20 | 36923192 | 0.92 | -0.97 | rs6130116  | G | A | 0.32 | 0.34 | 0.47 | 0.16 | SAMHD1 | intronic |
| 20 | 36925110 | 0.88 | -0.95 | rs6124452  | C | A | 0.33 | 0.34 | 0.47 | 0.15 | SAMHD1 | intronic |
| 20 | 36930113 | 0.92 | -0.97 | rs4810357  | A | G | 0.33 | 0.34 | 0.48 | 0.16 | SAMHD1 | intronic |
| 20 | 36930511 | 0.91 | -0.97 | rs57448673 | C | A | 0.32 | 0.34 | 0.48 | 0.15 | SAMHD1 | intronic |
| 20 | 36932008 | 0.94 | -0.97 | rs6124459  | G | A | 0.32 | 0.34 | 0.48 | 0.15 | SAMHD1 | intronic |
| 20 | 36932224 | 0.94 | -0.97 | rs62208120 | G | C | 0.32 | 0.34 | 0.48 | 0.15 | SAMHD1 | intronic |
| 20 | 36933066 | 0.94 | -0.97 | rs6130139  | T | C | 0.32 | 0.34 | 0.48 | 0.15 | SAMHD1 | intronic |
| 20 | 36937842 | 0.91 | -0.97 | rs6130150  | G | T | 0.04 | 0.28 | 0.48 | 0.15 | SAMHD1 | intronic |
| 20 | 36942292 | 0.88 | -0.97 | rs6124471  | C | T | 0.3  | 0.33 | 0.47 | 0.15 | SAMHD1 | intronic |
| 20 | 36942337 | 0.89 | -0.96 | rs6124472  | G | A | 0.3  | 0.33 | 0.47 | 0.15 | SAMHD1 | intronic |
| 20 | 36942341 | 0.9  | -0.97 | rs6124473  | C | T | 0.31 | 0.33 | 0.47 | 0.15 | SAMHD1 | intronic |
| 20 | 36950277 | 0.92 | -0.96 | rs4810362  | A | G | 0.32 | 0.34 | 0.49 | 0.15 | SAMHD1 | intronic |

**SNP: rs1291128 and variants with  $r^2 \geq 0.8$**

|    |          |      |       |           |   |   |      |      |      |      |           |          |
|----|----------|------|-------|-----------|---|---|------|------|------|------|-----------|----------|
| 20 | 36879944 | 0.95 | 0.97  | rs6065410 | C | G | 0.2  | 0.38 | 0.54 | 0.54 | C20orf118 | intronic |
| 20 | 36880305 | 0.99 | 1     | rs1291124 | A | G | 0.21 | 0.38 | 0.53 | 0.54 | C20orf118 | intronic |
| 20 | 36880556 | 0.99 | 1     | rs1291125 | T | C | 0.21 | 0.38 | 0.53 | 0.54 | C20orf118 | intronic |
| 20 | 36882286 | 1    | 1     | rs1291128 | T | C | 0.2  | 0.38 | 0.53 | 0.54 | C20orf118 | intronic |
| 20 | 36882545 | 0.99 | 1     | rs1291129 | T | C | 0.19 | 0.38 | 0.53 | 0.54 | C20orf118 | intronic |
| 20 | 36882663 | 1    | 1     | rs1291130 | G | C | 0.2  | 0.38 | 0.54 | 0.54 | C20orf118 | intronic |
| 20 | 36925642 | 0.83 | -0.97 | rs6030195 | G | A | 0.78 | 0.58 | 0.48 | 0.43 | SAMHD1    | intronic |
| 20 | 36926125 | 0.83 | -0.97 | rs6130119 | C | T | 0.8  | 0.58 | 0.48 | 0.43 | SAMHD1    | intronic |
| 20 | 36927518 | 0.83 | -0.97 | rs6016781 | C | T | 0.79 | 0.58 | 0.48 | 0.43 | SAMHD1    | intronic |
| 20 | 36927789 | 0.83 | -0.97 | rs6016783 | T | G | 0.8  | 0.58 | 0.49 | 0.43 | SAMHD1    | intronic |
| 20 | 36941421 | 0.86 | -0.97 | rs6030315 | C | A | 0.8  | 0.59 | 0.52 | 0.44 | SAMHD1    | intronic |
| 20 | 36941608 | 0.86 | -0.97 | rs1891643 | G | A | 0.8  | 0.59 | 0.52 | 0.44 | SAMHD1    | intronic |

A) SAMHD1 expression by risk groups

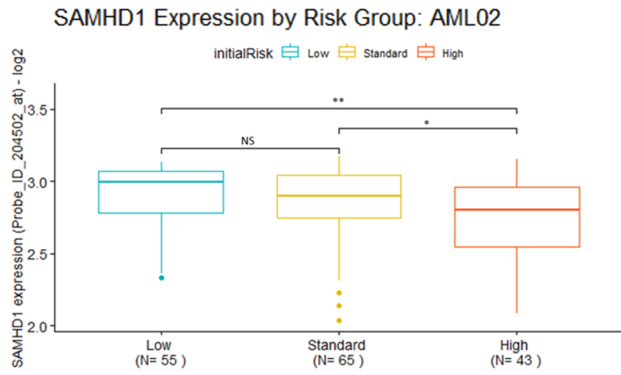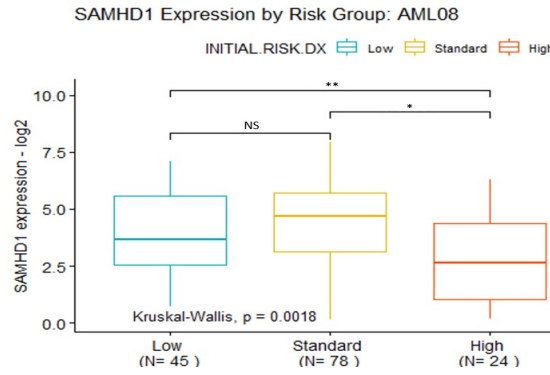

B) SAMHD1 expression by rs7265241 genotypes within AML02 cohort

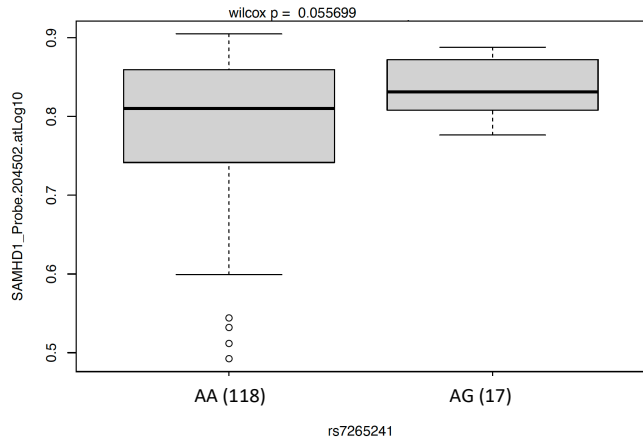

C) SAMHD1 expression by rs1291141 and rs1291128 in whole blood : GTEx database

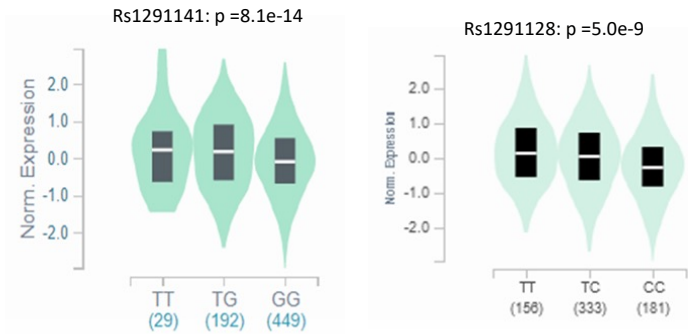

D) SAMHD1 expression in normal and tumor : TCGA- LAML cohort (median Expression level listed)

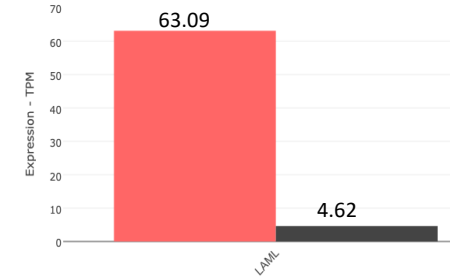

Supplementary Figure 1. SAMHD1 mRNA Expression by Initial Risk Group Assignment and by SAMHD1 SNPs.
